# Supplementary material for: The Economic and Environmental Aspects of Miscanthus × giganteus Phytomanagement Applied to Non-Agricultural Land
Source: MDPI journal article supplement (doi:10.3390/agronomy14040791), 2024-04-11
Supplement: s1 [file s1]

**Table S1.** Climate conditions in the research fields. Source: AQUASTAT [97].

| Location                                                   | Year | Jan   | Feb  | Mar  | Apr  | May  | Jun  | Jul  | Aug  | Sep  | Oct  | Nov  | Dec  |
|------------------------------------------------------------|------|-------|------|------|------|------|------|------|------|------|------|------|------|
| <b>Average monthly temperature, °C</b>                     |      |       |      |      |      |      |      |      |      |      |      |      |      |
| CZ                                                         | 2021 | -2.6  | -1.6 | 2.3  | 3.5  | 9.4  | 17.3 | 17.2 | 15.1 | 13.8 | 7.4  | 2.8  | -0.5 |
|                                                            | 2022 | -0.4  | 1.4  | 2.2  | 5.1  | 12.9 | 17.3 | 17.7 | 18.6 | 11.8 | 11.0 | 3.8  | -0.7 |
|                                                            | 2023 | 0.7   | -0.2 | 3.0  | 5.1  | 11.0 | 16.4 | 18.4 | 17.8 | 16.4 | 10.8 | 3.1  | 1.0  |
| KZ                                                         | 2017 | -5.3  | -3.4 | 2.9  | 10.4 | 18.1 | 22.0 | 26.3 | 22.6 | 18.9 | 11.2 | 3.8  | -2.7 |
|                                                            | 2018 | -10.4 | -3.6 | 7.4  | 11.4 | 15.8 | 21.9 | 25.3 | 24.4 | 17.5 | 10.7 | -1.2 | -3.5 |
|                                                            | 2019 | -2.4  | 02.4 | 6.8  | 12.6 | 15.7 | 21.7 | 27.2 | 24.7 | 19.0 | 11.5 | 0.3  | -2.1 |
| UA                                                         | 2018 | -0.3  | -5.3 | -1.6 | 12.5 | 15.3 | 17.5 | 18.3 | 19.4 | 14.3 | 10.4 | 4.2  | -1.0 |
|                                                            | 2019 | -5.0  | 1.0  | 4.4  | 8.5  | 12.2 | 19.4 | 17.7 | 19.2 | 14.5 | 11.2 | 7.1  | 2.0  |
|                                                            | 2020 | -0.6  | 0.8  | 2.9  | 6.9  | 10.4 | 17.1 | 17.9 | 19.0 | 15.7 | 11.3 | 4.5  | 0.9  |
| <b>Rainfall, mm</b>                                        |      |       |      |      |      |      |      |      |      |      |      |      |      |
| CZ                                                         | 2021 | 112   | 69   | 61   | 63   | 149  | 93   | 140  | 197  | 51   | 37   | 68   | 71   |
|                                                            | 2022 | 108   | 89   | 29   | 69   | 73   | 88   | 61   | 95   | 148  | 37   | 46   | 58   |
|                                                            | 2023 | 66    | 75   | 107  | 69   | 34   | 88   | 101  | 134  | 33   | 101  | 111  | 133  |
| KZ                                                         | 2017 | 26    | 43   | 54   | 136  | 83   | 72   | 22   | 37   | 30   | 21   | 56   | 28   |
|                                                            | 2018 | 22    | 37   | 107  | 96   | 114  | 56   | 18   | 56   | 46   | 49   | 47   | 20   |
|                                                            | 2019 | 31    | 34   | 40   | 168  | 64   | 58   | 14   | 42   | 71   | 63   | 50   | 40   |
| UA                                                         | 2018 | 42    | 89   | 75   | 48   | 100  | 201  | 217  | 77   | 73   | 50   | 59   | 93   |
|                                                            | 2019 | 81    | 42   | 55   | 82   | 244  | 129  | 151  | 73   | 55   | 49   | 43   | 88   |
|                                                            | 2020 | 35    | 110  | 82   | 26   | 180  | 276  | 165  | 46   | 83   | 124  | 46   | 41   |
| <b>Solar radiation, MJ m<sup>-2</sup> day<sup>-1</sup></b> |      |       |      |      |      |      |      |      |      |      |      |      |      |
| CZ                                                         | 2021 | 3.2   | 6.5  | 11.2 | 15.1 | 18.2 | 20.6 | 18.0 | 14.7 | 11.4 | 8.1  | 3.2  | 2.2  |
|                                                            | 2022 | 3.0   | 6.3  | 12.3 | 14.7 | 20.0 | 21.5 | 20.1 | 16.0 | 11.2 | 7.6  | 3.9  | 2.4  |
|                                                            | 2023 | 2.8   | 5.9  | 9.6  | 13.1 | 21.3 | 21.5 | 20.0 | 15.5 | 14.4 | 7.2  | 3.6  | 2.3  |
| KZ                                                         | 2017 | 6.9   | 10.7 | 14.4 | 17.5 | 22.5 | 23.1 | 24.6 | 22.3 | 17.6 | 11.9 | 7.5  | 5.8  |
|                                                            | 2018 | 7.5   | 10.0 | 13.3 | 18.6 | 22.8 | 22.6 | 25.0 | 20.6 | 16.9 | 11.1 | 7.6  | 5.8  |
|                                                            | 2019 | 6.9   | 10.1 | 15.8 | 15.1 | 23.7 | 23.4 | 25.6 | 21.8 | 16.5 | 11.9 | 7.5  | 5.8  |
| UA                                                         | 2018 | 4.1   | 7.2  | 11.8 | 17.9 | 21.1 | 17.6 | 16.9 | 18.1 | 12.9 | 8.7  | 4.9  | 2.6  |
|                                                            | 2019 | 3.7   | 6.6  | 11.5 | 15.2 | 14.4 | 21.2 | 20.4 | 17.8 | 13.5 | 9.3  | 4.3  | 3.0  |
|                                                            | 2020 | 3.9   | 6.0  | 11.0 | 19.7 | 16.5 | 16.9 | 18.5 | 19.2 | 14.3 | 6.8  | 4.2  | 3.2  |
